# Supplementary material for: Palladium catalysed [2 + 2 + 1] intramolecular cycloaddition for the preparation of bicyclo[3.3.0]octa-1.5-dien-3-ones from 1,6-diynesElectronic supplementary information (ESI) available: experimental. See http://www.rsc.org/suppdata/cc/b3/b302841k/
Source: Royal Society of Chemistry journal article supplement (doi:10.1039/b302841k), 2003-01-01
Supplement: b302841k.doc [file b302841k.doc]

Palladium catalysed [2+2+1] intramolecular cycloaddition for the preparation of bicycle [3.3.0] octa-1,5-diene-3-ones from 1,6-diynes

**Ronald Grigg, Lixin Zhang, Simon Collard and Ann Keep**

**Experimental**

Melting points were determined on a Koffler hot-stage apparatus and are uncorrected. Mass spectral data were obtained from a VG Autospec instrument at 70eV and on a Quattro MS at the EPSRC National Service, Swansea. Nuclear magnetic resonance spectra were recorded for solutions in CDCl3 at 250MHz (Bruker). Chemical shifts are given in parts per million (δ) downfield from tetramethylsilane (TMS) as internal standard. The following abbreviations are used: s = singlet, d = doublet, t = triplet, q = quartet, m = multiplet, dd = double doublet, bs = broad singlet. Microanalyses were obtained using a Carbo Erba MOD11016 instrument. Infrared spectra were recorded on a Nicolet Magna 560 FI-IR spectrometer. To prepare samples for IR a small amount of compound was dissolved in dichloromethane and transferred onto a germanium plate and the dichloromethane allowed to evaporate. Optical rotations were recorded on an AA100 Polarimeter.

Solvents were purified according to standard procedures. Column chromatography was performed with flash silica gel (Merck 9385). Petroleum ether refers to the fraction with b.p. 40-60 °C.

**7,7-Bis (methoxycarbonyl)-bicyclo [3.3.0] octa-1,5-dien-3-one (4a)**

A mixture of 4,4-dimethoxycarbonyl-1,6-diyne (0.21 g, 1.0 mmol), potassium carbonate (0.276 g, 2.0 mmol), palladium acetate (11 mg, 5 mol%) and PPh3 (26 mg, 10 mol%) in DMF (10 ml) was stirred and heated at 70 °C for 16h while CO (1 atm) was introduced *via* a balloon. The resulting mixture was then cooled, quenched by addition of water and extracted with dichloromethane (3x). The combined organic layers were washed with water, brine, dried (MgSO4), filtered and the filtrate evaporated under reduced pressure. The residue was purified by flash column chromatography, eluting with 1:3 v/v ethyl acetate / petroleum ether to afford the product (175 mg, 74 %) as colourless prisms, m.p. 78-80 °C; (Found: C, 60.7; H, 4.85; C12H12O5 requires: C, 61.0; H, 5.1%); H: 2.97 (s, 2H, CH2), 3.47 (s, 2H, CH2), 3.80 (s, 6H, OCH3), 6.02 (s, 1H, CH=C), 6.16 (s, 1H, CH=CO); 13C NMR: 207.0(C3), 181.5(C9, C10), 170.2 (C1), 148.9 (C5), 127.4, 124.3 (C2, C6), 69.5 (C7), 53.8 (C11, C12), 36.2, 34.6 (C4, C8); *m/z* (EI)(%): 236 (M+, 52), 177 (100), 149 (82), 133 (31), 118 (47), 89 (56), 59(72); max (film): 1732, 1704, 1600, 1435, 1242, 1195, 1046 cm-1.

**7,7-Di-carbonitrile-bicyclo [3.3.0] octa-1,5-dien-3-one (4b)**

Prepared as above from 2,2-di (2-propynyl) malononitrile (0.14 g, 1.0 mmol), potassium carbonate (0.276 g, 2.0 mmol), palladium acetate (11 mg,5 mol%) and PPh3 (26 mg, 10 mol%) in THF (10 ml) at 70 °C for 8 h while CO (1 atm) was introduced *via* a balloon. After workup the residue was purified by flash column chromatography, eluting with 1:3 v/v ethyl acetate / petroleum ether to afford the product (110 mg, 64 %) as colourless prisms, m.p. 169-172 °C; (Found: H.R.M.S 170.0469; C10H6N2O requires: 170.0480); H: 3.03 (s, 2H, CH2), 3.66 (s, 2H, CH2), 5.98 (s, 1H, CH=C), 6.15 (s, 1H, CH=CO); 13C NMR: 204.5 (C3), 173.2 (C1), 151.7 (C5), 125.9, 118.9 (C2, C6), 112.7 (9, 10), 39.9 (C7), 38.2, 34.7 (C4, C8); *m/z* (EI)(%): 170 (M+, 57), 142 (72), 115 (100), 39 (33); max (film): 1705, 1609 cm-1.

**Bicyclo [3.3.0] octa-1,5-dien-3-one (4c)**

Prepared as above form 1,6-diyne (0.092 g, 1.0 mmol), potassium carbonate (0.276 g, 2.0 mmol), palladium acetate (11 mg, 5 mol%) and PPh3 (26 mg, 10 mol%) in DMF (10 ml) at 70 °C for 8 h while CO (1 atm) was introduced *via* a balloon. After workup the residue was purified by flash column chromatography, eluting with 1:3 v/v ethyl acetate / petroleum ether to afford the product (40 mg, 33 %) as colourless prisms, m.p. 30-31 °C; (Found: H.R.M.S. 120.0579; C8H8O requires: 120.0575); H: 2.80-2.87 (m, 4H, C*H*2C*H*2), 2.89 (s, 2H, CH2C=O), 5.87 (t, 1H, *J* 0.6 Hz, C*H*=CH2), 6.14 (s, 1H, CH=CO); 13C NMR: 208.5 (C3), 188.0 (C1), 145.7 (C5), 131.9,121.0 (C2, C6), 36.0, 35.9 (C7, C8), 25.7(C4);*m/z* (ES)(%): 121.8 (M+H+, 100);max (film): 1708, 1265cm-1.

**7,7-Bis (ethoxycarbonyl)-bicyclo [3.3.0] octa-1,5-dien-3-one (4d)**

A mixture of 4,4-diethoxycarbonyl-1,6-diyne (0.236 g, 1.0 mmol), potassium carbonate(0.276 g, 2.0 mmol), PdCy 5 (16 mg, 2 mol%) in DMF (10 ml) was stirred and heated at 70 °C for 8h while CO (1 atm) was introduced *via* a balloon. The resulting mixture was then cooled, quenched by addition of water and extracted with dichloromethane (3x). The combined organic layers were washed with water, brine, dried (MgSO4), filtered and the solvent evaporated under reduced pressure. The residue was purified by flash column chromatography, eluting with 1:3 v/v ethyl acetate / petroleum ether to afford the product (175 mg, 67 %) as colourless prisms, m.p. 32-4 °C; (Found: C, 63.3; H, 6.15; C14H16O5 requires: C, 63.6; H, 6.15 %); H: 1.29 (t, *J* 7.1 Hz, 6H, CH3), 2.97 (s, 2H, CH2), 3.45 (s, 2H, CH2), 4.25 (q, *J* 7.1Hz, 4H, C*H*2CH3), 6.01 (s, 1H, CH=C), 6.17 (s, 1H, CH=CO); 13C NMR 207.0 (C=O), 181.9 (C=O), 169.8 (C), 148.7 (C), 127.7 (CH), 124.2 (CH), 70.0 (C), 62.7 (CH2), 36.1 (CH2), 34.4 (CH2); *m/z* (ES) (%): 287 (M++ Na+ 100); max (film): 1730, 1706, 1601, 1287, 1240, 1178, 1112, 1096, 1068 and 1045 cm-1.

**7-Carbonitrile, 7-methoxycarbonyl-bicyclo [3.3.0] octa-1,5-dien-3-one (4e)**

Prepared as above from 4-carbonitrile-4-methoxycarbonyl-1,6-diyne (0.175 g, 1.0 mmol), potassium carbonate (0.276 g, 2.0 mmol), PdCy 5 (16 mg, 2 mol%) in DMF (10 ml) at 70 °C for 8h while CO (1 atm) was introduced *via* a balloon. After workup the residue was purified by flash column chromatography, eluting with 1:3 v/v ethyl acetate / petroleum ether to afford the product (118 mg, 58 %) as colourless prisms, m.p. 61-2 °C; (Found: C, 64.7; H, 4.55, N, 7.05; C11H9NO3 requires: C, 65.0; H, 4.45, N, 6.90 %); H: 3.03 (s, 2H, CH2=CO), 3.41 and 3.74 (2 × d, 2 × 1H, *J* 9.1 Hz, CH2=C), 3.90 (s, 3H, OCH3), 6.02 (s, 1H, CH=C), 6.13 (s, 1H, CH=CO); 13C NMR 204.0(C=O), 178.5 (C=O), 167.1 (C), 151.1 (C), 125.8 (CH), 123.9 (CH), 117.7 (C), 55.8 (C), 54.9 (CH3), 36.8 (CH2), 36.1 (CH2); *m/z* (ES)(%): 204.2 (M+H+, 100); max (film): 1747, 1707, 1604, 1257 cm-1.

**7,7-Bis ( methoxycarbonyl)-bicyclo [3.3.0]octa-1,5-dien-2-methyl-3-one (4f)**

Prepared as above from dimethyl 2-but-2-ynyl-2-prop-2-ynyl-malonate (0.22 g, 1.0 mmol), potassium carbonate (0.276 g, 2.0 mmol), palladium acetate (11 mg, 5 mol%) and PPh3 (26 mg, 10 mol%) in THF (10 ml) at 85 °C for 48 h while CO (1 atm) was introduced *via* a balloon. After workup the residue was purified by flash column chromatography, eluting with 1:3 v/v ethyl acetate / petroleum ether to afford the product (75 mg, 30 %) as a colourless oil; (Found: H.R.M.S 251.0922; C13H14O5 requires: 251.0919); H: 1.83 (s, 3H, CCH3), 2.96 (s, 2H, CH2), 3.39 (s, 2H, CH2), 3.79 (s, 6H, OCH3), 6.02(s, 1H, CH=C); 13C NMR: 206.0 (C=O), 175 (C=O), 170 (C), 147 (C), 133 (C), 124.2 (CH), 69 (C), 53.3 (CH3), 35.4 (CH2), 33.3 (CH2), 30.9 (CH3); *m/z* (EI) (%): 250.1 (M+, 13), 191.1 (89), 163(32), 103 (96), 91 (44), 77 (48), 59 (100); max (film): 1733, 1706, 1435, 1268, 1199, 1167 and 1063 cm-1.
